# Supplementary material for: Graphene–Si CMOS oscillators
Source: Royal Society of Chemistry journal article supplement (doi:10.1039/c8nr07862a), 2019-01-01
Supplement: c8nr07862a1.pdf [file c8nr07862a1.pdf]

# Graphene-Si CMOS Oscillators

Carlo Gilardi,<sup>†</sup> Paolo Pedrinazzi,<sup>†</sup> Kishan Ashokbhai Patel,<sup>†</sup> Luca Anzi,<sup>†</sup>

Birong Luo,<sup>‡</sup> Timothy J. Booth,<sup>‡</sup> Peter Bøggild,<sup>‡</sup> and Roman Sordan<sup>\*,†</sup>

<sup>†</sup>*L-NESS, Department of Physics, Politecnico di Milano, Via Anzani 42, 22100 Como, Italy*

<sup>‡</sup>*DTU Nanotech, Technical University of Denmark, Ørsted Plads, 2800 Lyngby, Denmark*

E-mail: roman.sordan@polimi.it

## Supporting Information

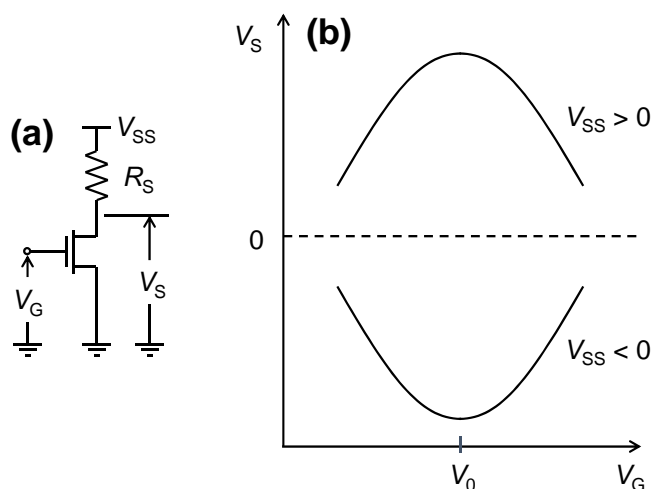

Figure S1: Static voltage transfer characteristic of the graphene circuit used in the oscillators. (a) The circuit comprises a graphene field-effect transistor (GFET) connected to a supply ( $V_{SS}$ ) via load resistor ( $R_S$ ). The resistance of the GFET ( $R_{ch}$ ) depends on the applied gate voltage ( $V_G$ ) and it reaches a maximum value  $R_{ch,max}$  at the Dirac voltage ( $V_G = V_0$ ). The output voltage of the circuit ( $V_S$ ) is the voltage on  $R_{ch}$  and therefore  $V_S = V_{SS}R_{ch}/(R_{ch} + R_S) = V_{SS}/(1 + R_S/R_{ch})$ , corresponding to a simple voltage divider.<sup>7</sup> (b) The schematic of the static voltage transfer characteristic  $V_S(V_G)$ . The extreme value of this function is  $V_S(V_0) = V_{SS}/(1 + R_S/R_{ch,max})$ . The function has a maximum for  $V_{SS} > 0$  and minimum for  $V_{SS} < 0$ .

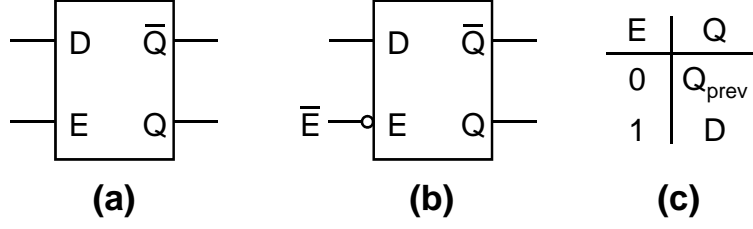

Figure S2: Gated D latch. (a) Schematic of a gated D latch which is enabled (active) when its enable line (E) is set high (1). This latch is used in the parabolic oscillator. (b) Schematic of a gated D latch which is enabled (active) when its enable line ( $\bar{E}$ ) is set low (0). This latch is used in the bow tie oscillator. (c) The truth table of a gated D latch. When the latch is enabled ( $E = 1$ ), its output Q is equal to the data input D. Otherwise, the output Q stays in the previous state ( $Q_{\text{prev}}$ ), i.e., the last state when the latch was enabled. If the oscillators are built from discrete components, the parabolic oscillator is simpler because most of the commercial D latches are type (a). This means that an additional inverter is needed to realize the D latch type (b), which is used in the bow tie oscillator.

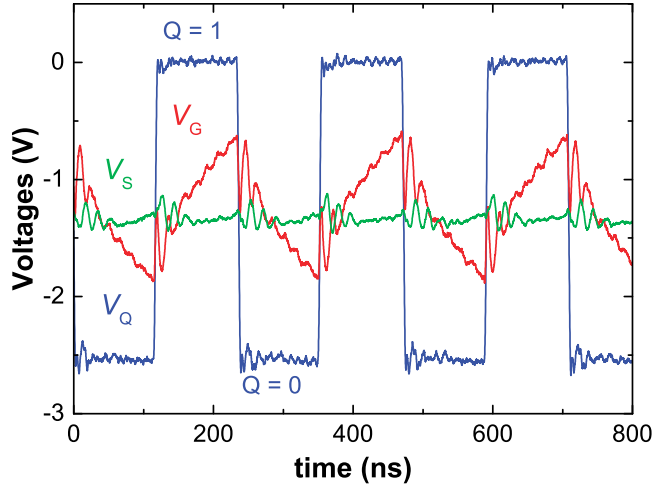

Figure S3: The waveforms measured in the parabolic oscillator exhibiting the highest oscillation frequency  $f_{\text{osc}} = 4.2$  MHz which was possible to obtain with the used setup. The circuit parameters were  $V_{\text{SS}} = -2.5$  V,  $R = 300 \ \Omega$ , and  $C = 0.5$  nF. The actual time constant of the RC timing circuit was slightly larger than  $RC$  due to additional capacitance of the cables used to connect the Si CMOS circuit to the GFET. A high-frequency ( $\sim 60$  MHz) disturbance visible in the waveforms is a consequence of multiple reflections in the cables used to connect the circuits.

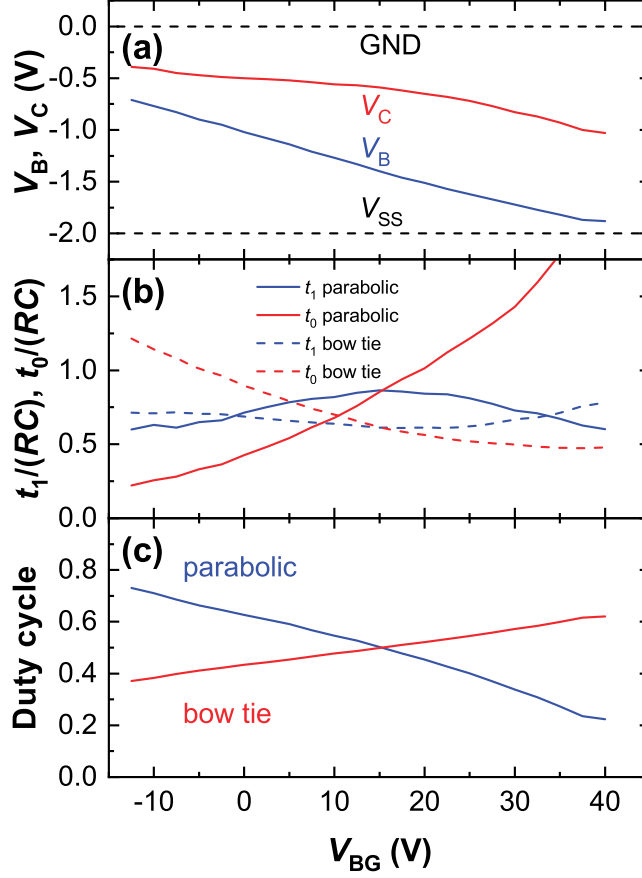

Figure S4: Calculated pulse width modulator (PWM) characteristics. (a) The intersection voltages  $V_B$  and  $V_C$  calculated from the measured static voltage transfer characteristics shown in Figure 3(a) in the main text. (b) Durations of the high ( $t_1$ ) and low ( $t_0$ ) state in the parabolic and bow tie oscillator calculated from the expressions for  $t_1$  and  $t_0$  in the main text and data in (a). (c) Duty cycle ( $D$ ) in the parabolic and bow tie oscillator calculated as  $D = t_1/(t_1 + t_0)$ . In the parabolic oscillator, the calculated duty cycle ranges from 22 % to 73 %, which is very close to the duty cycle measured on the actual waveforms, as shown in Figure 3(b).

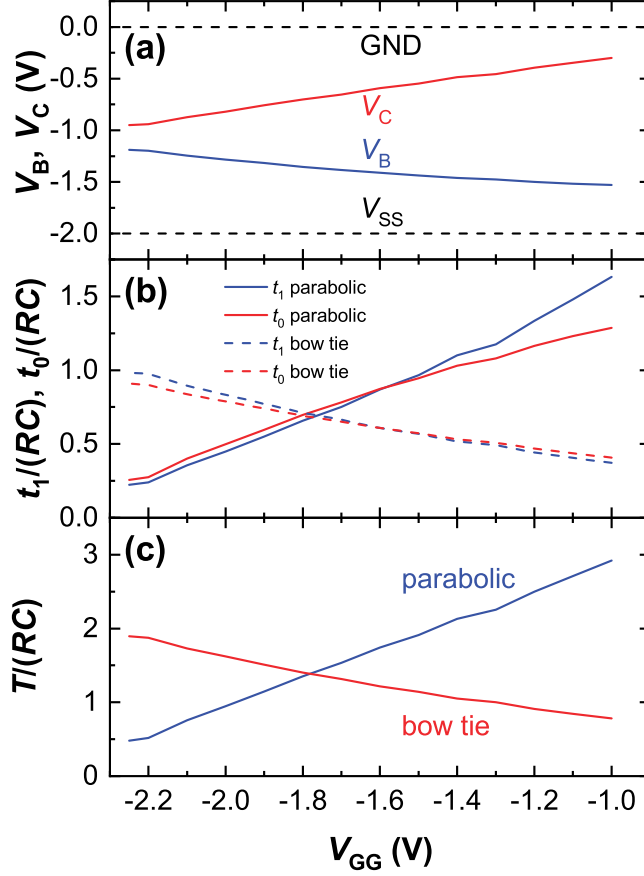

Figure S5: Calculated voltage-controlled oscillator (VCO) characteristics. (a) The intersection voltages  $V_B$  and  $V_C$  calculated from the measured static voltage transfer characteristics shown in Figure 4(a) in the main text. (b) Durations of the high ( $t_1$ ) and low ( $t_0$ ) state in the parabolic and bow tie oscillator calculated from the expressions for  $t_1$  and  $t_0$  in the main text and data in (a). (c) Period of oscillation ( $T$ ) in the parabolic and bow tie oscillator calculated as  $T = t_1 + t_0$ . In the parabolic oscillator, the calculated period ranges from  $0.48RC$  to  $2.92RC$ , corresponding to  $28 \text{ kHz} < f_{\text{osc}} < 174 \text{ kHz}$ , for  $R = 10 \text{ k}\Omega$  and  $C = 1.2 \text{ nF}$ . This is very close to the oscillation frequency measured on the actual waveforms, as shown in Figure 4(b).
